# Supplementary material
Source: Springer Nature journal article supplement (https://www.springermedizin.de/resource/supplementary/13063_2012_1356_MOESM1_ESM.pdf/9619724)
Supplement: MOESM1 [file 9619724]

# The CopenHeart<sub>VR</sub> Trial

QUAN before intervention: Survey based pre study (n=742)

QUAL before intervention: interview pre study (n=10)

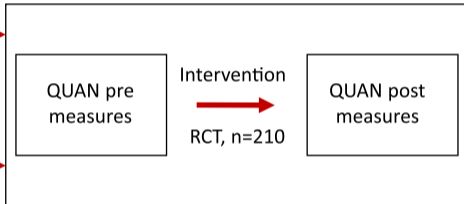

Economic evaluation

QUAL post intervention: interview study (n=10% of participants)

Register based followup

Interpretation based on QUAN and QUAL results
